# Supplementary material
Source: PubMed Central journal article supplement (PMC8363071)
Supplement: NIHMS1731600-supplement-Supplemental_Material_2.pdf [file NIHMS1731600-supplement-Supplemental_Material_2.pdf]

Supplemental Table B: Means and Ranges of the Baseline Measures

| Construct/Measure                                     | Mean or Prevalence Rate                                                                                                                                              | Overall Range<br>(Sample Range, if applicable) |
|-------------------------------------------------------|----------------------------------------------------------------------------------------------------------------------------------------------------------------------|------------------------------------------------|
| Age                                                   | 20.47 years                                                                                                                                                          | 18-25 years                                    |
| Female Sex                                            | 65.1% female                                                                                                                                                         | not applicable                                 |
| Race/Ethnicity                                        | 53.5% white, non-Hispanic<br>30.2% white, Hispanic<br>7.0% black, non-Hispanic<br>4.7% Asian, non-Hispanic<br>2.3% American Indian, non-Hispanic<br>2.5% multiracial | not applicable                                 |
| Grade Point Average                                   | 3.14                                                                                                                                                                 | 0-4 (2.39-4.00)                                |
| ADHD Symptom Level <sup>a</sup>                       | 61.51                                                                                                                                                                | 18-90 (39-78)                                  |
| Negative Urgency <sup>b</sup>                         | 9.84                                                                                                                                                                 | 4-16 (5-15)                                    |
| Positive Urgency <sup>b</sup>                         | 11.40                                                                                                                                                                | 4-16 (4-16)                                    |
| Lack of Perseverance <sup>b</sup>                     | 7.47                                                                                                                                                                 | 4-16 (4-13)                                    |
| Sensation Seeking <sup>b</sup>                        | 8.56                                                                                                                                                                 | 4-16 (4-16)                                    |
| Lack of Premeditation <sup>b</sup>                    | 7.74                                                                                                                                                                 | 4-16 (4-14)                                    |
| Delay Discounting <sup>c</sup>                        | 0.030                                                                                                                                                                | 0-1 (0.00016-0.249)                            |
| Lifetime Alcohol and PSM<br>Co-ingestion <sup>d</sup> | 76.7%                                                                                                                                                                | not applicable                                 |
| Lifetime Non-oral PSM <sup>d</sup>                    | 46.5%                                                                                                                                                                | not applicable                                 |
| Lifetime Recreational PSM<br>Motives <sup>d</sup>     | 41.9%                                                                                                                                                                | not applicable                                 |

PSM = Prescription Stimulant Misuse

<sup>a</sup> via the Adult ADHD Self-Report Scale (ASRS) screener

<sup>b</sup> via the Short UPPS-P Impulsive Behavior scale (SUPPS-P)

<sup>c</sup> via the 27-item Monetary Choice Questionnaire from Kirby et al., 1999

<sup>d</sup> via the Stimulant Survey Questionnaire (SSQ)
